# Supplementary material for: Discovery and Genomic Function of a Novel Rice Dwarf-Associated Bunya-like Virus
Source: MDPI journal article supplement (doi:10.3390/v14061183), 2022-05-29
Supplement: s1 [file s1]

**Table S1.** Primers used in this study.

| Name               | Sequence                                           |
|--------------------|----------------------------------------------------|
| RDaBV-Detection-F  | CTGATCTGGTGAGGTCCATGC                              |
| RDaBV-Detection-R  | TCAGCCAGTGGACACATAATGTAC                           |
| RDaBV-L-1F         | GCAATAGTCTCTGATGTTAACTCCTGT                        |
| RDaBV-L-2F         | CCATGATTTGTTTATCAGCAGCC                            |
| RDaBV-L-3F         | GAGACAGGTAGTAATCACCAACCTTC                         |
| RDaBV-L-1R         | CTCGGCATGGTTCAAAGGTTC                              |
| RDaBV-L-2R         | GAGGGTTTCGAGAGATAGTGATACAG                         |
| RDaBV-M-F          | GTCAGCAAAAAACTCATGATTGA                            |
| RDaBV-M-R          | CCTTCCTTACCTGAACAGAC                               |
| RDaBV-S-F          | GTCAGCAAAAAACTCATGATTGA                            |
| RDaBV-S-R          | CCTTCCTTACCTGAACAGAC                               |
| RDaBV-M-RACE-R1    | CTGCATGAATTCAGAATTGTTGACCTG                        |
| RDaBV-M-RACE-R2    | GGAGAACATCAATGCCCGAG                               |
| RDaBV-M-RACE-R3    | CTGAGATAACACTTCCCATTGGAAGAC                        |
| RDaBV-M-RACE-F1    | GGTGTATTGCAGAGGAAGACTCG                            |
| RDaBV-M-RACE-F2    | GAGGATGACTCTGGTGATGATGTG                           |
| RDaBV-M-RACE-F3    | CAGAGGATAGGAGCTATCAATGGTCT                         |
| RDaBV-S-RACE-R1    | GCTTGAGATCCCAGGACAC                                |
| RDaBV-S-RACE-R2    | CCTCCTTGCCTTGGTTTCTTGT                             |
| RDaBV-S-RACE-R3    | CTCGTTAACGATTTCCTTTTGGAAGAAG                       |
| RDaBV-S-RACE-F1    | GCCTCAGGACTTAGTTACTGCATT                           |
| RDaBV-S-RACE-F2    | GAGATGCACTGCAAGTATTCCAC                            |
| RDaBV-S-RACE-F3    | GAAAATACCAACGAACGGGTGC                             |
| RDaBV-L-RACE-R1    | CATAGAAGTGAGAGAAGAAGTCAATGAAG                      |
| RDaBV-L-RACE-R2    | TGACGGTAGATACTATGAACCACAGG                         |
| RDaBV-L-RACE-R3    | GATTGCAGAAATCTTCAACTCAACAATGC                      |
| RDaBV-L-RACE-F1    | GATTCTCAACCTCTTTGAACTTGAGTGT                       |
| RDaBV-L-RACE-F2    | CTCATACCCTTGAACAAACCGTTG                           |
| RDaBV-L-RACE-F3    | GGGCATACTGATGCTTGGTAGTAGG                          |
| RDaBV-NSs-Flag-F   | GAGCTCGGTACCCGGGGAATGAAGCTGATCAATTCATATTCAGGCT     |
| RDaBV-NSs-Flag-R   | GTCGTCGACTCTAGAGGATAGCAGAACAAAGTTCTTCATCAAGCTC     |
| RDaBV-N-Flag-F     | GAGCTCGGTACCCGGGGAATGTCTTCAAGCGGAACAG              |
| RDaBV-N-Flag-R     | GTCGTCGACTCTAGAGGAATTTGTCTTTGCAACCTGTTG            |
| RDaBV-NS-Flag-F    | GAGCTCGGTACCCGGGGAATGTCTCAAGTCAAAATGATTTGAG        |
| RDaBV-NS-Flag-R    | GTCGTCGACTCTAGAGGACCTTAGAATGCTGAAAAGTGAAG          |
| RDaBV-NSs-GFP-F    | GAGCTCGGTACCCGGGGAATGAAGCTGATCAATTCATATTCAGG       |
| RDaBV-NSs-GFP-R    | CATGTCGACTCTAGAGGATAGCAGAACAAAGTTCTTCATCAAG        |
| RDaBV-N-GFP-F      | GAGCTCGGTACCCGGGGAATGTCTTCAAGCGGAACAG              |
| RDaBV-N-GFP-R      | CATGTCGACTCTAGAGGAATTTGTCTTTGCAACCTGTTG            |
| RDaBV-NS-GFP-F     | GAGCTCGGTACCCGGGGAATGTCTCAAGTCAAAATGATTTGAG        |
| RDaBV-NS-GFP-R     | CATGTCGACTCTAGAGGACCTTAGAATGCTGAAAAGTGAAG          |
| RDaBV-NSs-pgr106-F | CAGCTAGCATCGATTGGCGCGCCATGAAGCTGATCAATTCATATTCAGG  |
| RDaBV-NSs-pgr106-R | AACCGTTCATCGGCGGTGCGACTCATAGCAGAACAAAGTTCTTCATCAAG |
| RDaBV-N-pGR106-F   | CAGCTAGCATCGATTGGCGCGCCATGTCTTCAAGCGGAACAG         |
| RDaBV-N-pGR106-R   | AACCGTTCATCGGCGGTGCGACTCAATTTGTCTTTGCAACCTGTTG     |
| RDaBV-NS-pGR106-F  | CAGCTAGCATCGATTGGCGCGCCATGTCTCAAGTCAAAATGATTTGAG   |
| RDaBV-NS-pGR106-R  | AACCGTTCATCGGCGGTGCGACTCACCTTAGAATGCTGAAAAGTGAAG   |
| RBSDV-detection-F  | CCGACCAACAATCACTCTGT                               |
| RBSDV-detection-R  | GGTCAGTTCGTATTCATCGG                               |
| SRBSDV-detection-F | TATTCAAAGTTATTTCCGT                                |
| SRBSDV-detection-R | ACATGAATAGTTTCAAGT                                 |
| RDV-detection-F    | TACTTTCTCCGGGCTCACAACAGG                           |
| RDV-detection-R    | CCCCGCAACAGACCGAAACAA                              |

|                  |                          |
|------------------|--------------------------|
| RSV-detection-F  | GTCAGACCACGCTCCTTCTTC    |
| RSV-detection-R  | GGATATGACTATGTGCATCAC    |
| RRSV-detection-F | ACCGTCGTTGAGCTACCATCCATT |
| RRSV-detection-R | GGCGGGCCACTCAAACCAT      |
| RGDV-detection-F | CGGAGTATGGGACCAAATGTTCC  |
| RGDV-detection-R | CCGCCTGGTAGCTGGCATATAT   |
| RSMV-detection-F | CTCCAACTATCATCCGCTATGC   |
| RSMV-detection-R | CCATCCGAGATAAGGTCACTGT   |

---

**Table S4.** The BLASTx search using the L segment of RDaBV query.

| Description                  | Scientific Name                                                      | family           | genus            | Query E<br>Cover value | Per.<br>Ident | Acc.<br>Len | GenBank<br>accession no. | Max<br>Score | Total<br>Score |
|------------------------------|----------------------------------------------------------------------|------------------|------------------|------------------------|---------------|-------------|--------------------------|--------------|----------------|
| RNA-dependent RNA polymerase | Botrytis cinerea negative-stranded RNA virus 2                       | unclassified     | unclassified     | 96%                    | 0             | 57.86% 2135 | QJT73695.1               | 2527         | 2527           |
| RNA-dependent RNA polymerase | Erysiphe necator associated negative-stranded RNA virus 8            | unclassified     | unclassified     | 96%                    | 0             | 57.76% 2135 | QJW70349.1               | 2524         | 2524           |
| RNA-dependent RNA polymerase | Plasmopara viticola lesion associated mycobunyavirales-like virus 8  | Discoviridae     | Orthodisco virus | 96%                    | 0             | 57.76% 2135 | QJX19788.1               | 2524         | 2524           |
| RNA-dependent RNA polymerase | Erysiphe necator associated negative-stranded RNA virus 9            | unclassified     | unclassified     | 96%                    | 0             | 54.83% 2139 | QJW70358.1               | 2415         | 2415           |
| RNA-dependent RNA polymerase | Erysiphe necator associated negative-stranded RNA virus 10           | unclassified     | unclassified     | 96%                    | 0             | 53.73% 2160 | QJW70360.1               | 2312         | 2312           |
| RNA-dependent RNA polymerase | Erysiphe necator associated negative-stranded RNA virus 18           | unclassified     | unclassified     | 96%                    | 0             | 52.83% 2137 | QJW70341.1               | 2292         | 2292           |
| RNA-dependent RNA polymerase | Plasmopara viticola lesion associated mycobunyavirales-like virus 9  | Discoviridae     | Orthodisco virus | 97%                    | 0             | 50.28% 2142 | QJX19792.1               | 2178         | 2178           |
| RNA-dependent RNA polymerase | Coniothyrium diplodiella negative-stranded RNA virus 1               | Discoviridae     | Orthodisco virus | 97%                    | 0             | 50.16% 2142 | QDB75015.1               | 2174         | 2174           |
| RNA-dependent RNA polymerase | Plasmopara viticola lesion associated mycobunyavirales-like virus 10 | unclassified     | unclassified     | 83%                    | 0             | 55.36% 1832 | QJX19789.1               | 2093         | 2093           |
| RNA-dependent RNA polymerase | Rice Peribunya-like virus 1                                          | Peribunyaviridae | unclassified     | 96%                    | 0             | 47.03% 2137 | QKN84393.1               | 1917         | 1917           |
| RNA-dependent RNA polymerase | Grapevine-associated negative single-stranded RNA virus 5            | unclassified     | unclassified     | 96%                    | 0             | 46.55% 2138 | QXN75415.1               | 1899         | 1899           |
| RNA-dependent RNA polymerase | Penicillium roseopurpureum negative ssRNA virus 1                    | Discoviridae     | Orthodisco virus | 96%                    | 0             | 46.36% 2136 | AYP71800.1               | 1862         | 1862           |
| RNA-dependent RNA polymerase | Fusarium poae negative-stranded-like virus 2                         | unclassified     | unclassified     | 95%                    | 0             | 46.55% 2146 | QQO58802.1               | 1857         | 1857           |
| RNA-dependent RNA polymerase | Fusarium poae negative-stranded virus 2                              | unclassified     | unclassified     | 96%                    | 0             | 44.85% 2155 | YP_009272912.1           | 1842         | 1842           |
| RNA dependent RNA polymerase | Ixodes scapularis associated virus-5                                 | unclassified     | unclassified     | 97%                    | 0             | 42.33% 2138 | AUW34407.1               | 1590         | 1590           |
| RNA dependent RNA polymerase | Plasmopara viticola lesion associated mycobunyavirales-like virus 5  | unclassified     | unclassified     | 79%                    | 0             | 47.34% 1791 | QGY72642.1               | 1585         | 1585           |
| RNA dependent RNA polymerase | Penicillium discovirus                                               | Discoviridae     | Orthodisco virus | 96%                    | 0             | 41.48% 2123 | AWN00471.1               | 1584         | 1584           |
| RNA dependent RNA polymerase | Aspergillus fumigatus negative-stranded RNA virus 1                  | Discoviridae     | Orthodisco virus | 96%                    | 0             | 41.49% 2123 | BCH36617.1               | 1556         | 1556           |
| RNA dependent RNA polymerase | Erysiphe necator associated negative-stranded RNA virus 4            | unclassified     | unclassified     | 93%                    | 0             | 41.82% 2116 | QJW70357.1               | 1528         | 1528           |
| RNA dependent RNA polymerase | Erysiphe necator associated negative-stranded RNA virus 3            | unclassified     | unclassified     | 95%                    | 0             | 38.58% 2080 | QJW70350.1               | 1384         | 1384           |
| RNA dependent RNA polymerase | Plasmopara viticola lesion associated mycobunyavirales-like virus 6  | unclassified     | unclassified     | 68%                    | 0             | 45.69% 1490 | QGY72643.1               | 1285         | 1285           |
| RNA dependent RNA polymerase | Plasmopara viticola lesion associated mycobunyavirales-like virus 4  | Discoviridae     | Orthodisco virus | 50%                    | 0             | 53.12% 1113 | QGY72641.1               | 1181         | 1181           |

**Table S5.** The BLASTx search using the M segment of RDaBV query.

| Description             | Scientific Name                                                     | family       | genus           | Query E<br>Cover | E value  | Per.<br>Ident | Acc.<br>Len | Accession  | Max<br>Score | Total<br>Score |
|-------------------------|---------------------------------------------------------------------|--------------|-----------------|------------------|----------|---------------|-------------|------------|--------------|----------------|
| NS                      | Plasmopara viticola lesion associated mycobunyavirales-like virus 8 | Discoviridae | Orthodiscovirus | 89%              | 4.00E-99 | 37.77% 489    |             | QNQ74054.1 | 320          | 320            |
| NS                      | Plasmopara viticola lesion associated mycobunyavirales-like virus 4 | Discoviridae | Orthodiscovirus | 90%              | 6.00E-80 | 33.77% 516    |             | QNQ74053.1 | 271          | 271            |
| NS                      | Plasmopara viticola lesion associated mycobunyavirales-like virus 9 | Discoviridae | Orthodiscovirus | 86%              | 4.00E-59 | 31.14% 574    |             | QNQ74048.1 | 217          | 217            |
| NS1                     | Coniothyrium diplodiella negative-stranded RNA virus 1              | Discoviridae | Orthodiscovirus | 85%              | 3.00E-51 | 28.99% 597    |             | QFQ60953.1 | 196          | 196            |
| nonstructural protein 1 | Penicillium roseopurpureum negative ssRNA virus 1                   | Discoviridae | Orthodiscovirus | 41%              | 2.00E-32 | 33.62% 509    |             | QEQ12678.1 | 142          | 142            |
| NS1                     | Penicillium discovirus                                              | Discoviridae | Orthodiscovirus | 29%              | 4.00E-14 | 30.23% 370    |             | AWN00472.1 | 86.7         | 86.7           |

**Table S6.** The BLASTp search using the N protein of RdaBV query.

| Description          | Scientific Name                                                     | family       | genus           | Query Cover | E value  | Per. Ident | Acc. Len | Accession  | Max Score | Total Score |
|----------------------|---------------------------------------------------------------------|--------------|-----------------|-------------|----------|------------|----------|------------|-----------|-------------|
| NC                   | Plasmopara viticola lesion associated mycobunyavirales-like virus 4 | Discoviridae | Orthodiscovirus | 74%         | 2.00E-99 | 53.41%     | 286      | QNQ74050.1 | 306       | 306         |
| NC                   | Plasmopara viticola lesion associated mycobunyavirales-like virus 9 | Discoviridae | Orthodiscovirus | 68%         | 3.00E-91 | 55.38%     | 261      | QNQ74049.1 | 285       | 285         |
| NC                   | Plasmopara viticola lesion associated mycobunyavirales-like virus 8 | Discoviridae | Orthodiscovirus | 87%         | 1.00E-89 | 46.97%     | 320      | QNQ74051.1 | 283       | 283         |
| nucleocapsid         | Coniothyrium diplodiella negative-stranded RNA virus 1              | Discoviridae | Orthodiscovirus | 65%         | 9.00E-85 | 54.98%     | 366      | QFQ60954.1 | 272       | 272         |
| nucleocapsid protein | Coniothyrium diplodiella negative-stranded RNA-like virus 1         | Discoviridae | Orthodiscovirus | 65%         | 5.00E-76 | 47.01%     | 350      | QQO58803.1 | 249       | 249         |
| nucleocapsid protein | Penicillium roseopurpureum negative ssRNA virus 1                   | Discoviridae | Orthodiscovirus | 57%         | 5.00E-67 | 51.85%     | 340      | QE12679.1  | 226       | 226         |
| Nucleocapsid         | Penicillium discovirus                                              | Discoviridae | Orthodiscovirus | 56%         | 5.00E-47 | 39.25%     | 265      | AWN00473.1 | 171       | 171         |

#### A. RBSDV detection

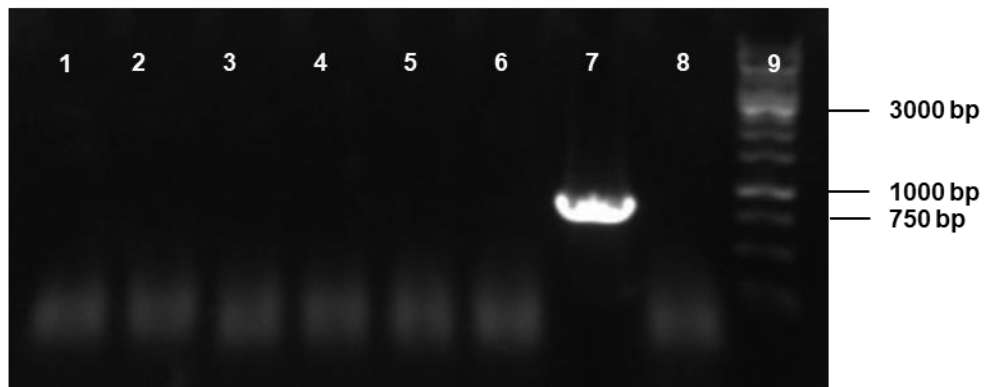

#### B. SRBSDV detection

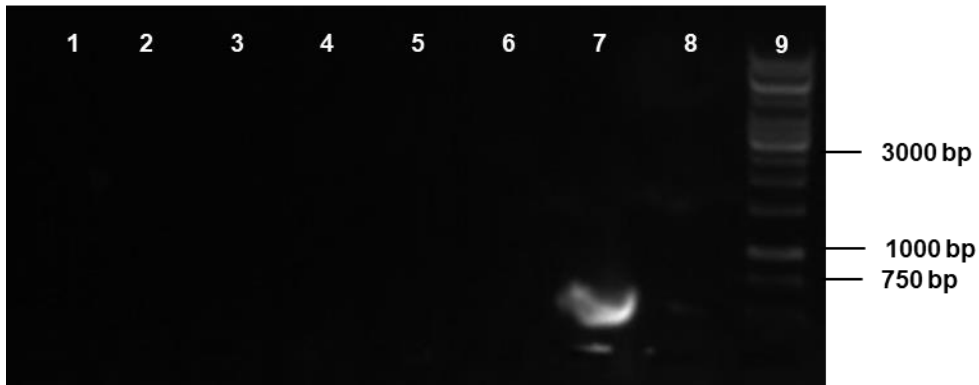

**C. RSMV detection**

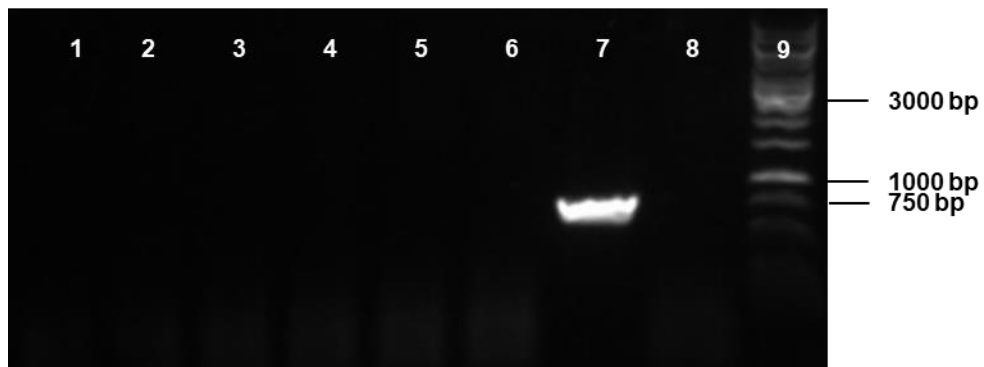

**D. RSV detection**

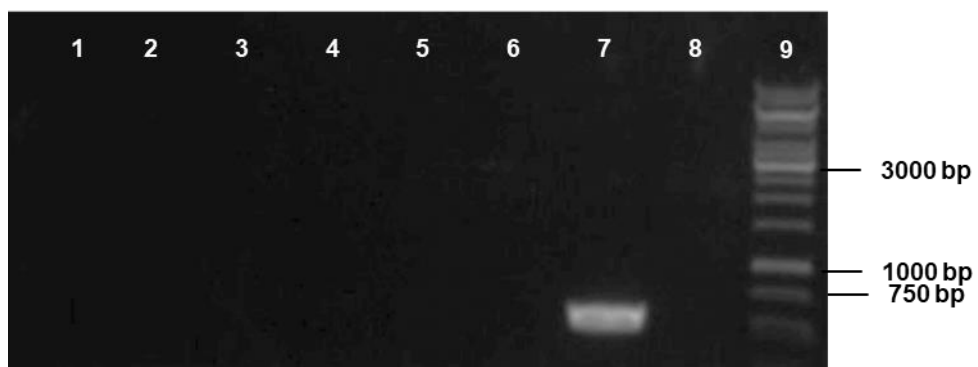

**E. RDV detection**

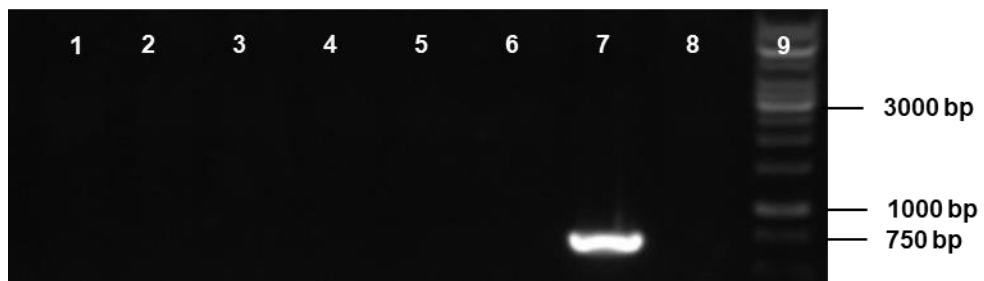

**F. RGDV detection**

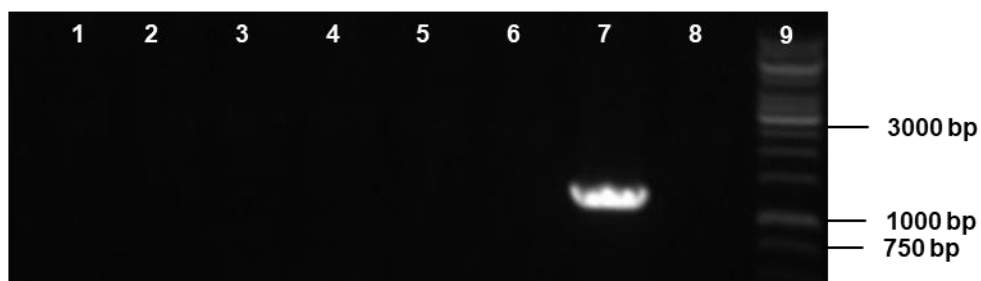

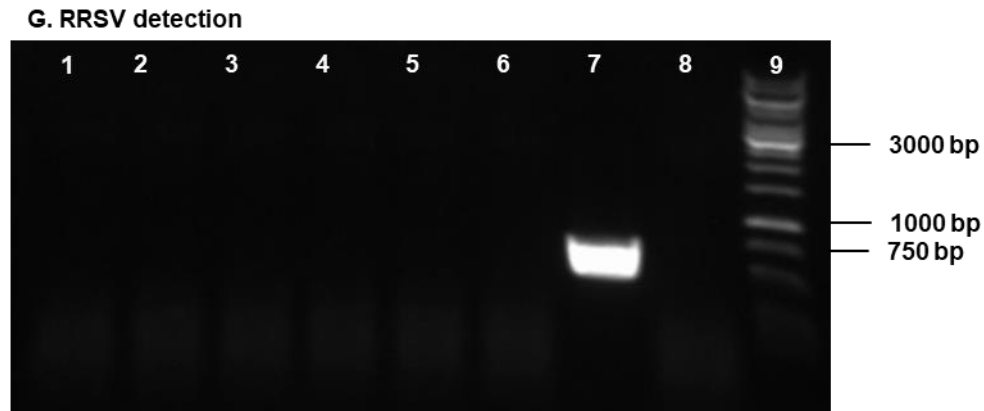

**Figure S1.** RT-PCR detecting RBSDV (A), SRBSDV (B), RSMV (C) RSV (D), RDV (E), RGDV (F) and RRSV (G) in field-collected rice plants.

Lanes 1-6 were field-collected rice plants as shown in Figure 1A. Lanes 7 and 8 were rice plants infected by the virus and uninfected rice plants, using as positive and negative controls. Lane 9 was a 1 kb DNA marker.

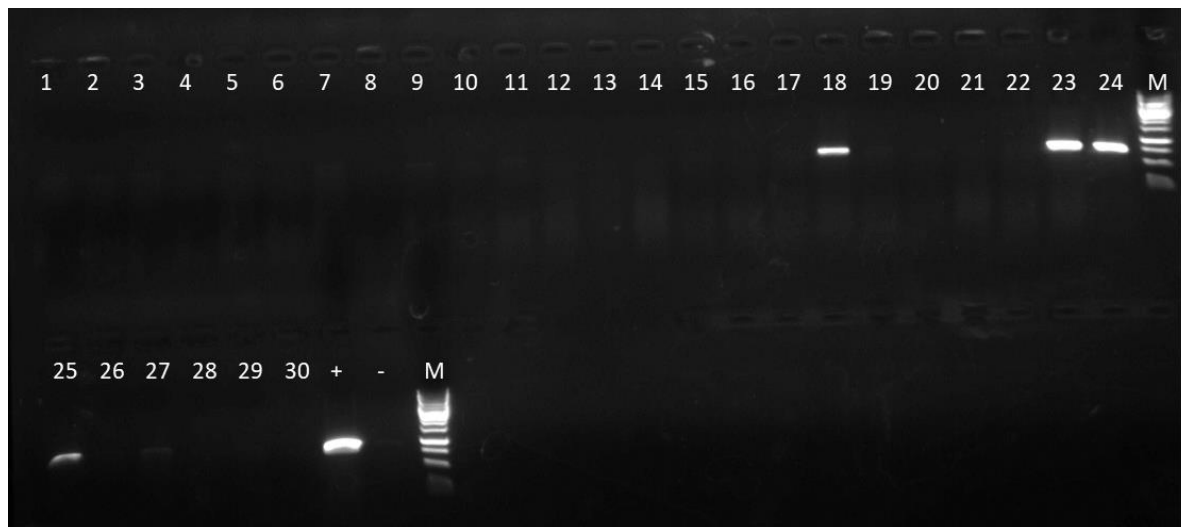

**Figure S2.** RT-PCR detecting RDaBV in field-collected rice plants.

Lanes 1-30 were 30 rice plant samples collected from paddy fields in Zhejiang Province of China in 2021. + was a RDaBV-infected rice plant. – was an uninfected rice plant. M was a 1 kb DNA marker.
